# Supplementary material
Source: ML conference proceedings conference paper supplement (https://proceedings.mlr.press/v70/johnson17a.html)

## A. Proof of Theorem 2.1

**Theorem 2.1** (Safeness of StingyCD). *In Algorithm 2, every skipped update would, if computed, result in  $\delta = 0$ . That is, if  $q^{(t-1)} \leq \tau_i$  and  $x_i^{(t-1)} = 0$ , then*

$$\max \left\{ -x_i^{(t-1)}, \frac{\langle \mathbf{A}_i, \mathbf{b} - \mathbf{A}\mathbf{x}^{(t-1)} \rangle - \lambda}{\|\mathbf{A}_i\|^2} \right\} = 0.$$

*Proof.* Since  $x_i^{(t-1)} = 0$ , we need to prove that if  $q^{(t-1)} \leq \tau_i$ , then

$$\langle \mathbf{A}_i, \mathbf{r}^{(t-1)} \rangle - \lambda \leq 0, \quad (3)$$

where we have used the definition  $\mathbf{r}^{(t-1)} = \mathbf{b} - \mathbf{A}\mathbf{x}^{(t-1)}$ .

We show by induction that  $q^{(t)} = \|\mathbf{r}\mathbf{r} - \mathbf{r}^{(t)}\|^2$ . The base case is that  $q^{(t-1)} = 0$  whenever StingyCD performs the update  $\mathbf{r}\mathbf{r} \leftarrow \mathbf{r}^{(t-1)}$ . The inductive step is that

$$q^{(t)} = q^{(t-1)} - 2\delta \langle \mathbf{A}_i, \mathbf{r}^{(t-1)} - \mathbf{r}\mathbf{r} \rangle + \delta^2 \|\mathbf{A}_i\|^2 \quad (4)$$

$$= \|\mathbf{r}^{(t-1)} - \mathbf{r}\mathbf{r}\|^2 - 2\delta \langle \mathbf{A}_i, \mathbf{r}^{(t-1)} - \mathbf{r}\mathbf{r} \rangle + \delta^2 \|\mathbf{A}_i\|^2 \quad (5)$$

$$= \|\mathbf{r}^{(t-1)} - \delta\mathbf{A}_i - \mathbf{r}\mathbf{r}\|^2 \quad (6)$$

$$= \|\mathbf{r}^{(t)} - \mathbf{r}\mathbf{r}\|^2. \quad (7)$$

Recall the definition  $\tau_i = \text{sign}(g_i) \frac{g_i^2}{\|\mathbf{A}_i\|^2}$ , where  $g_i = -\langle \mathbf{A}_i, \mathbf{r}\mathbf{r} \rangle + \lambda$ . It follows that

$$q^{(t-1)} \leq \tau_i \quad \Rightarrow \quad \|\mathbf{r}^{(t-1)} - \mathbf{r}\mathbf{r}\|^2 \leq \text{sign}(g_i) \frac{g_i^2}{\|\mathbf{A}_i\|^2} \quad (8)$$

$$\Rightarrow \quad \|\mathbf{r}^{(t-1)} - \mathbf{r}\mathbf{r}\| \leq \frac{g_i}{\|\mathbf{A}_i\|} \quad (9)$$

$$\Rightarrow \quad \|\mathbf{A}_i\| \|\mathbf{r}^{(t-1)} - \mathbf{r}\mathbf{r}\| \leq -\langle \mathbf{A}_i, \mathbf{r}\mathbf{r} \rangle + \lambda \quad (10)$$

$$\Rightarrow \quad \langle \mathbf{A}_i, \mathbf{r}\mathbf{r} \rangle + \|\mathbf{A}_i\| \|\mathbf{r}^{(t-1)} - \mathbf{r}\mathbf{r}\| - \lambda \leq 0 \quad (11)$$

$$\Rightarrow \quad \langle \mathbf{A}_i, \mathbf{r}^{(t-1)} \rangle - \lambda \leq 0. \quad (12)$$

□

## B. Proof of Theorem 2.2

**Theorem 2.2** (Per iteration time complexity of StingyCD). *Algorithm 2 can be implemented so that iteration  $t$  requires*

- *Less time than an identical iteration of Algorithm 1 if  $q^{(t-1)} \leq \tau_i$  and  $x_i^{(t-1)} = 0$  (the update is skipped) and  $\mathbf{r}\mathbf{r}$  is not updated. Specifically, StingyCD requires  $\mathcal{O}(1)$  time, while CD requires  $\mathcal{O}(\text{NNZ}(\mathbf{A}_i))$  time.*
- *The same amount of time (up to an  $\mathcal{O}(1)$  term) as a CD iteration if the update is not skipped and  $\mathbf{r}\mathbf{r}$  is not updated. In particular, both algorithms require the same number of  $\mathcal{O}(\text{NNZ}(\mathbf{A}_i))$  operations.*
- *More time than a CD iteration if  $\mathbf{r}\mathbf{r}$  is updated. In this case, StingyCD requires  $\mathcal{O}(\text{NNZ}(\mathbf{A}))$  time.*

*Proof.* Note that at each iteration, CD computes a dot product of length  $\text{NNZ}(\mathbf{A}_i)$  to compute  $\delta$ . If  $\delta \neq 0$ , an additional  $\mathcal{O}(\text{NNZ}(\mathbf{A}_i))$  operation is required to update  $\mathbf{r}^{(t)}$ .

**Case 1: the update is skipped and  $\mathbf{r}$  is not updated** In this case, the only computation StingyCD performs during this iteration is (i.) deciding not to update the reference vector, (ii.) choosing a coordinate to update, and (iii.) checking whether  $q^{(t-1)} \leq \tau_i$  and  $\mathbf{x}_i^{(t-1)} = 0$ . Steps (i.) and (ii.) can be easily be defined so that they require  $\mathcal{O}(1)$  time, and checking the conditions for (iii.) also requires constant time.

**Case 2: the update is not skipped and  $\mathbf{r}$  is not updated** In this case, the only additional operation that we have not already considered is the update to  $q^{(t)}$ . This update can be performed in constant time by caching previous computations of  $\langle \mathbf{A}_i, \mathbf{r} \rangle$ ,  $\langle \mathbf{A}_i, \mathbf{r}^{(t-1)} \rangle$ , and  $\|\mathbf{A}_i\|^2$ . The value of  $\langle \mathbf{A}_i, \mathbf{r} \rangle$  was computed when computing the threshold  $\tau_i$ , and  $\langle \mathbf{A}_i, \mathbf{r}^{(t-1)} \rangle$  and  $\|\mathbf{A}_i\|^2$  are necessary to compute  $\delta$ .

**Case 3:  $\mathbf{r}$  is updated** In this case, computing  $\tau_i$  for all  $i$  requires computing  $\langle \mathbf{A}_i, \mathbf{r} \rangle$  for all columns in  $\mathbf{A}$ . This is a matrix-vector multiply that requires  $\mathcal{O}(\text{NNZ}(\mathbf{A}_i))$  operations.  $\square$

### C. Proof of Theorem 3.2

**Theorem 3.2** (Equation for  $P(U^{(t)})$ ). Assume  $x_i^{(t-1)} = 0$  and  $\tau_i \in (-q^{(t-1)}, q^{(t-1)})$ . Then Assumption 3.1 implies

$$P(U^{(t)}) = \begin{cases} \frac{1}{2} I_{(1-\tau_i/q^{(t-1)})}(\frac{n-1}{2}, \frac{1}{2}) & \text{if } \tau_i \geq 0, \\ 1 - \frac{1}{2} I_{(1+\tau_i/q^{(t-1)})}(\frac{n-1}{2}, \frac{1}{2}) & \text{otherwise,} \end{cases}$$

where  $I_x(a, b)$  is the regularized incomplete beta function.

*Proof.* Recall the illustration from Figure 2:

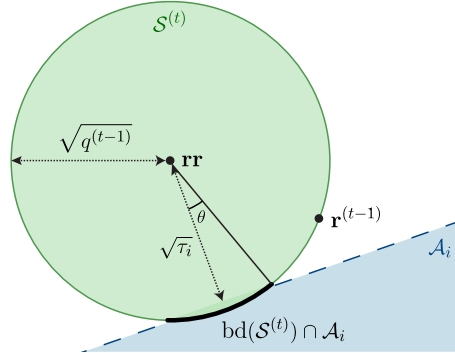

Because we assume  $\mathbf{r}^{(t-1)}$  is uniformly distributed on the boundary of  $\mathcal{S}^{(t)}$ , the probability that  $\mathbf{r}^{(t-1)} \in \mathcal{A}_i$  is given by dividing the area of  $\mathcal{A}_i \cap \text{bd}(\mathcal{S}^{(t)})$  by the area of  $\text{bd}(\mathcal{S}^{(t)})$ . The region  $\mathcal{A}_i \cap \text{bd}(\mathcal{S}^{(t)})$  is a hyperspherical cap. In the case that  $\mathbf{r} \notin \mathcal{A}_i$ , we know from (Li, 2011) that the area of  $\mathcal{A}_i \cap \text{bd}(\mathcal{S}^{(t)})$  is given by

$$\frac{1}{2} \text{area}(\mathcal{S}^{(t)}) I_{\sin(\theta)^2}(\frac{n-1}{2}, \frac{1}{2}), \quad (13)$$

where  $\text{area}(\mathcal{S}^{(t)})$  is the surface area of  $\mathcal{S}^{(t)}$  and  $\theta$  is the angle indicated in the diagram.

When  $\tau_i \geq 0$ , note that by definition of  $\tau_i$ , we have  $\mathbf{r} \notin \mathcal{A}_i$ . It follows then that when  $\tau_i \geq 0$ , we have

$$P(U_t) = \frac{\frac{1}{2} \text{area}(\mathcal{S}^{(t)}) I_{\sin(\theta)^2}(\frac{n-1}{2}, \frac{1}{2})}{\text{area}(\mathcal{S}^{(t)})} \quad (14)$$

$$= \frac{1}{2} I_{(1-\cos(\theta)^2)}(\frac{n-1}{2}, \frac{1}{2}) \quad (15)$$

$$= \frac{1}{2} I_{(1-\tau_i/q^{(t-1)})}(\frac{n-1}{2}, \frac{1}{2}). \quad (16)$$

In the case that  $\tau_i < 0$ , we have  $\mathbf{r} \in \mathcal{A}_i$ , and we can use symmetry to see that

$$P(U_t) = 1 - \frac{1}{2} I_{(1+\tau_i/q^{(t-1)})}(\frac{n-1}{2}, \frac{1}{2}). \quad (17)$$

$\square$

## D. Details of estimating $P(U^{(t)})$ in StingyCD+

In §3.1, we defined the probability  $P(U^{(t)})$ . Assuming  $\tau_i \in (-q^{(t-1)}, q^{(t-1)})$ , we have

$$P(U^{(t)}) = \begin{cases} \frac{1}{2} I_{(1-\tau_i/q^{(t-1)})}(\frac{n-1}{2}, \frac{1}{2}) & \text{if } \tau_i \geq 0, \\ 1 - \frac{1}{2} I_{(1+\tau_i/q^{(t-1)})}(\frac{n-1}{2}, \frac{1}{2}) & \text{otherwise,} \end{cases} \quad (18)$$

where  $I_x(a, b)$  is the regularized incomplete beta function.

In our implementation of StingyCD+, we compute  $P(U^{(t)})$  approximately using a lookup table. First, we make use of the approximation

$$\frac{1}{2} I_{(1-\tau_i/q^{(t-1)})}(\frac{n-1}{2}, \frac{1}{2}) \approx 1 - \Phi\left(\sqrt{\tau_i(n-1)/q^{(t-1)}}\right). \quad (19)$$

Above,  $\Phi$  is the standard normal CDF.

Using (19) is not strictly necessary. Using (19) leads to a simpler implementation, however, since we no longer need to compute the regularized incomplete beta function. Instead we only need to define a lookup table for the standard normal CDF. We expect this approximation has negligible effect on StingyCD+, since (19) is a very close approximation for moderately large  $n$ .

Using (19), our StingyCD+ implementation uses a lookup table of 128 values for  $1 - \Phi(\sqrt{x})$ . Values of  $x$  are spaced uniformly between 0 and 32 inclusive, meaning the table stores the values  $1 - \Phi(0), 1 - \Phi(\sqrt{0.25}), 1 - \Phi(\sqrt{0.5}), \dots, 1 - \Phi(\sqrt{32})$ .

To estimate  $P(U^{(t)})$  during each iteration, StingyCD+ first computes  $\tau_i(n-1)/q^{(t-1)}$  and then reads the closest value from the table that results in an upper bound for  $P(U^{(t)})$ . For example, if  $\tau_i(n-1)/q^{(t-1)} = 0.2$ , our approximation of  $P(U^{(t)})$  is  $1 - \Phi(\sqrt{0.25}) = 0.308\dots$ . If  $\tau_i(n-1)/q^{(t-1)} = -0.2$ , then our approximation of  $P(U^{(t)})$  is  $\Phi(\sqrt{0.5}) = 0.760\dots$

## E. Proof of Theorem 3.3

**Theorem 3.3** (StingyCD+ converges to a solution of (P)). *In StingyCD+, assume  $\xi^{(t)} \leq \text{NNZ}(\mathbf{x}^{(t-1)})$  for all  $t > 0$ . Also, for each  $i \in [m]$ , assume the largest number of consecutive iterations during which `get_next_coordinate()` does not return  $i$  is bounded as  $t \rightarrow \infty$ . Then*

$$\lim_{t \rightarrow \infty} f(\mathbf{x}^{(t)}) = f(\mathbf{x}^*).$$

Before proving the theorem, we introduce and prove a few lemmas.

**Lemma E.1.** *Given the assumptions of Theorem 3.3, let  $M$  be a number larger than the maximum number of consecutive iterations `get_next_coordinate()` does not return coordinate  $i$  for all  $i \in [m]$  as  $t \rightarrow \infty$ . Consider any iteration  $t > 0$  of StingyCD+ and any  $i \in [m]$  such that  $x_i^{(t-1)} \neq 0$ . Then there exists an iteration  $t' \geq t$  during which StingyCD+ computes an update to coordinate  $i$ . Furthermore, we have  $t' \leq t + mM$ .*

*Proof.* Define  $\mathcal{C}^{(t-1)}$  as the set of coordinates that correspond to nonzero entries in  $\mathbf{x}^{(t-1)}$ :

$$\mathcal{C}^{(t-1)} = \{i : x_i^{(t-1)} \neq 0\}. \quad (20)$$

Let  $i_{\text{delayed}}$  denote the unique coordinate in  $\mathcal{C}^{(t-1)}$  such that the delay  $D_i^{(t)}$  is largest:

$$i_{\text{delayed}} = \operatorname{argmax}_{i \in \mathcal{C}^{(t-1)}} D_i^{(t)}. \quad (21)$$

This coordinate is unique because  $t_i^{\text{last}}$  differs for all  $i \in \mathcal{C}^{(t-1)}$ —StingyCD+ updates at most one coordinate during each iteration.

We must have  $D_{i_{\text{delayed}}}^{(t)} \geq \text{NNZ}(\mathbf{x}^{(t-1)})$ , since the  $\text{NNZ}(\mathbf{x}^{(t-1)}) - 1$  coordinates in  $\mathcal{C}^{(t-1)}$  not equal to  $i_{\text{delayed}}$  were updated before  $i_{\text{delayed}}$  was last updated (otherwise (21) would not hold). Thus, counting these updates, as well as the update to weight  $i_{\text{delayed}}$  during iteration  $t_{i_{\text{delayed}}}^{\text{last}}$ , we must have  $D_{i_{\text{delayed}}}^{(t)} \geq \text{NNZ}(\mathbf{x}^{(t-1)})$ .

Now let  $k \geq 0$  be the smallest such  $k$  for which `get_next_coordinate()` returns  $i_{\text{delayed}}$  during iteration  $t + k$ . Note that  $k < M$ . We must have  $D_{i_{\text{delayed}}}^{(t+k)} \geq \text{NNZ}(\mathbf{x}^{(t+k-1)})$ , since (i) until an update for coordinate  $i$  is computed,  $D_i^{(t)}$  is nondecreasing with  $t$  for all  $i$ , (ii) we have  $D_{i_{\text{delayed}}}^{(t)} \geq \text{NNZ}(\mathbf{x}^{(t-1)})$ , and (iii) whenever  $\text{NNZ}(\mathbf{x}^{(t')}) = \text{NNZ}(\mathbf{x}^{(t'-1)}) + 1$  for  $t' \in \{t, t+1, \dots, t+k-1\}$ , we must also have  $D_{i_{\text{delayed}}}^{(t'+1)} = D_{i_{\text{delayed}}}^{(t')} + 1$ —an update to a zero entry of  $\mathbf{x}$  increases the delay for all coordinates by 1.

In addition, since  $i_{\text{delayed}} \in \mathcal{C}^{(t-1)}$  and  $i_{\text{delayed}}$  has not been updated since before iteration  $t$ , we must have  $x_{i_{\text{delayed}}}^{(t+k-1)} \neq 0$ . Thus, by definition of  $P(U^{(t+k)})$ , we must have  $P(U^{(t+k)}) = 1$ . Applying the assumption that  $\xi^{(t+k)} \leq \text{NNZ}(\mathbf{x}^{(t+k-1)})$ , it follows that

$$P(U^{(t+k)})D_{i_{\text{delayed}}}^{(t+k)} = D_{i_{\text{delayed}}}^{(t+k)} \geq \text{NNZ}(\mathbf{x}^{(t+k-1)}) \geq \xi^{(t+k)}. \quad (22)$$

Thus, the condition for skipping update  $t + k$  in StingyCD+ is *not* satisfied. That is, during iteration  $t + k$ , StingyCD+ computes an update to coordinate  $i_{\text{delayed}}$ . It follows that  $D_{i_{\text{delayed}}}^{(t+k+1)} = 1$ . That is,  $i_{\text{delayed}}$  now corresponds to the weight with *smallest* delay among nonzero weights.

Now consider any  $i$  such that  $x_i^{(t-1)} \neq 0$ . This coordinate was last updated during iteration  $t_i^{\text{last}}$ . It follows that if coordinate  $i$  is not updated by iteration  $t_i^{\text{last}} + (m-1)M$ , then  $i$  corresponds to the weight with largest delay among nonzero weights. This is because we have shown that the nonzero weight with maximum delay is updated within  $M$  iterations, after which it becomes the nonzero weight with smallest delay. Thus, before coordinate  $i$  is updated again, at most  $(m-1)$  other coordinates correspond to the nonzero weight with largest delay, each of which requires at most  $M$  iterations to update. It follows that after an additional  $M$  iterations—that is, by iteration  $t_i^{\text{last}} + mM$ —coordinate  $i$  must be updated.  $\square$

**Lemma E.2.** *Given the assumptions of Theorem 3.3, then for some set  $\mathcal{F}$ , StingyCD+ converges to a solution of the problem*

$$\begin{aligned} \underset{\mathbf{x} \in \mathbb{R}^m}{\text{minimize}} \quad & f(\mathbf{x}) := \frac{1}{2} \|\mathbf{A}\mathbf{x} - \mathbf{b}\|^2 + \lambda \langle \mathbf{1}, \mathbf{x} \rangle \\ \text{s.t.} \quad & \mathbf{x} \geq 0 \\ & x_i = 0 \quad \forall i \in \mathcal{F} \end{aligned} \quad (\text{P}') .$$

*Proof.* First note that  $f(\mathbf{x}^{(t)})$  is nonincreasing with  $t$ . This is because whenever  $\mathbf{x}^{(t)} \neq \mathbf{x}^{(t-1)}$ , we can write

$$\mathbf{x}^{(t)} = \mathbf{x}^{(t-1)} + \delta \mathbf{e}_i \quad (23)$$

for some coordinate  $i$ , where

$$\delta = \underset{\delta' : x_i^{(t-1)} + \delta' \geq 0}{\text{argmin}} f(\mathbf{x}^{(t-1)} + \delta' \mathbf{e}_i) = \max \left\{ -x_i^{(t-1)}, \frac{\langle \mathbf{A}_i, \mathbf{b} - \mathbf{A}\mathbf{x}^{(t-1)} \rangle - \lambda}{\|\mathbf{A}_i\|^2} \right\}. \quad (24)$$

Second, note that for all  $t$ ,  $\mathbf{x}^{(t)} \geq 0$ . From the definition of  $f$ , it follows that  $f(\mathbf{x}^{(t)}) \geq 0$  for all  $t$ .

Thus,  $f(\mathbf{x}^{(t)})$  is a bounded monotone sequence, which implies that  $\lim_{t \rightarrow \infty} f(\mathbf{x}^{(t)})$  exists.

Now let us assume that  $\mathbf{x}^{(t)}$  does not converge to a solution of (P') for some set  $\mathcal{F}$ . Then there exists a value  $\nu > 0$  for which the following holds: for all  $t' > 0$ , there exists an iteration  $t > t'$  such that for some  $i$  where  $x_i^{(t-1)} \neq 0$ , we have

$$|\delta| = \left| \max \left\{ -x_i^{(t-1)}, \frac{\langle \mathbf{A}_i, \mathbf{r}^{(t-1)} \rangle - \lambda}{\|\mathbf{A}_i\|^2} \right\} \right| \geq \nu. \quad (25)$$

In other words, if StingyCD+ updated coordinate  $i$  (corresponding to a nonzero weight) during iteration  $t$ , the magnitude of the update would be at least positive value  $\nu$ .

Also, note that after any update  $\delta$  to a coordinate  $i$  during iteration  $t$  of StingyCD+, we have (by Taylor expansion)

$$f(\mathbf{x}^{(t)}) - f(\mathbf{x}^{(t-1)}) = \left( \lambda - \langle \mathbf{A}_i, \mathbf{r}^{(t-1)} \rangle \right) \delta + \frac{1}{2} \|\mathbf{A}_i\|^2 \delta^2 \quad (26)$$

$$\leq -\frac{1}{2} \|\mathbf{A}_i\|^2 \delta^2. \quad (27)$$

Now define  $\hat{f} = \lim_{t \rightarrow \infty} f(\mathbf{x}^{(t)})$ . Consider an iteration  $t'$  such that  $f(\mathbf{x}^{(t')}) \leq \hat{f} + \epsilon$ , where we define  $\epsilon > 0$  later.

According to (25), there exists an iteration  $t > t'$  such that for some  $i$  for which  $x_i^{(t-1)} > 0$ , we have

$$\left| \max \left\{ -x_i^{(t-1)}, \frac{\langle \mathbf{A}_i, \mathbf{r}^{(t-1)} \rangle - \lambda}{\|\mathbf{A}_i\|^2} \right\} \right| \geq \nu. \quad (28)$$

According to Lemma E.1, StingyCD+ will compute at least one update to coordinate  $i$  between iterations  $t$  and  $t + mM$ . During each of the iterations between iteration  $t$  and  $t + mM$ , suppose that coordinate  $i'$  is updated by an amount  $\delta'$ . It must be the case then that

$$\delta' \leq \frac{\sqrt{2\epsilon}}{\|\mathbf{A}_{i'}\|}. \quad (29)$$

Otherwise the fact that  $\hat{f} = \lim_{t \rightarrow \infty} f(\mathbf{x}^{(t)})$  would be violated due to (27).

Now let  $T$  denote the iteration during which coordinate  $i$  is next updated. From the triangle inequality and (29), it follows that

$$\left\| \mathbf{r}^{(t-1)} - \mathbf{r}^{(T-1)} \right\| \leq mM\sqrt{2\epsilon}. \quad (30)$$

This implies that

$$\frac{\langle \mathbf{A}_i, \mathbf{r}^{(T-1)} \rangle}{\|\mathbf{A}_i\|^2} - \frac{\langle \mathbf{A}_i, \mathbf{r}^{(t-1)} \rangle}{\|\mathbf{A}_i\|^2} \in \left[ -\frac{mM\sqrt{2\epsilon}}{\|\mathbf{A}_i\|}, +\frac{mM\sqrt{2\epsilon}}{\|\mathbf{A}_i\|} \right]. \quad (31)$$

Now let  $\delta$  be the update to coordinate  $i$  during iteration  $T$ . It follows that

$$|\delta| = \left| \max \left\{ x_i^{(T-1)}, \frac{\langle \mathbf{A}_i, \mathbf{r}^{(T-1)} \rangle - \lambda}{\|\mathbf{A}_i\|^2} \right\} \right| \quad (32)$$

$$\geq \left| \max \left\{ x_i^{(t-1)}, \frac{\langle \mathbf{A}_i, \mathbf{r}^{(t-1)} \rangle - \lambda}{\|\mathbf{A}_i\|^2} \right\} \right| - \frac{mM\sqrt{2\epsilon}}{\|\mathbf{A}_i\|} \quad (33)$$

$$\geq \nu - \frac{mM\sqrt{2\epsilon}}{\|\mathbf{A}_i\|}. \quad (34)$$

Now let us define  $s = \min_{i' : \|\mathbf{A}_{i'}\| > 0} \|\mathbf{A}_{i'}\|$ .

$$\epsilon = \frac{1}{8} \left( \frac{\nu s}{mM} \right)^2 \quad (35)$$

Then it follows that

$$|\delta| > \frac{1}{2}\nu. \quad (36)$$

From (27), it follows that

$$f(x^{(T)}) \leq f(\mathbf{x}^{(T-1)}) - \frac{1}{2} \|\mathbf{A}_i\|^2 \delta^2 \leq \hat{f} + \epsilon - \frac{1}{2} s^2 \nu^2 < \hat{f}, \quad (37)$$

which violates the assumption that  $\lim_{t \rightarrow \infty} f(\mathbf{x}^{(t)}) = \hat{f}$ .

Thus, StingyCD+ must converge to a solution of (P') for some set  $\mathcal{F}$ .

□

*Proof of Theorem 3.3.* Suppose that StingyCD+ does not converge to a solution to (P).

Now define  $\hat{f} = \lim_{t \rightarrow \infty} f(\mathbf{x}^{(t)})$ . Also define  $\hat{\mathbf{r}} = \lim_{t \rightarrow \infty} \mathbf{r}^{(t)}$  and  $\hat{\mathbf{x}} = \lim_{t \rightarrow \infty} \mathbf{x}^{(t)}$ .

Lemma E.2 guarantees that the algorithm at least converges to a solution of (P') for some set  $\mathcal{F}$ . Using this assumption, if StingyCD+ does not converge to (P)'s solution then there exists a  $\nu > 0$  such that for some  $i$  such that  $\hat{x}_i \neq 0$ , we have

$$\langle \mathbf{A}_i, \hat{\mathbf{r}} \rangle - \lambda \geq \nu. \quad (38)$$

Consider an iteration  $t'$  such that  $f(\mathbf{x}^{(t'-1)}) \leq \hat{f} + \epsilon$ , where we define  $\epsilon > 0$  later. By Taylor expansion, we have for any  $t \geq t'$ ,

$$f(\mathbf{x}^{(t)}) = f(\hat{\mathbf{x}}) + \langle \nabla f(\hat{\mathbf{x}}), \mathbf{x}^{(t)} - \hat{\mathbf{x}} \rangle + \frac{1}{2} \|\mathbf{A}\mathbf{x}^{(t)} - \mathbf{A}\hat{\mathbf{x}}\|^2 \quad (39)$$

$$\geq \hat{f} + \frac{1}{2} \|\hat{\mathbf{r}} - \mathbf{r}^{(t-1)}\|^2. \quad (40)$$

This implies that for any  $t \geq t'$ , we have

$$\|\hat{\mathbf{r}} - \mathbf{r}^{(t-1)}\| \leq \sqrt{2\epsilon}. \quad (41)$$

Define  $\epsilon = \min_{i': \|\mathbf{A}_{i'}\| \neq 0} \frac{\nu^2}{8\|\mathbf{A}_{i'}\|^2}$ . It follows then that for all  $t \geq t'$ ,

$$\langle \mathbf{A}_i, \mathbf{r}^{(t-1)} \rangle - \lambda \geq \langle \mathbf{A}_i, \hat{\mathbf{r}} \rangle - \|\mathbf{A}_i\| \sqrt{2\epsilon} - \lambda \geq \nu - \|\mathbf{A}_i\| \sqrt{2\epsilon} \geq \frac{1}{2}\nu. \quad (42)$$

Also, if we assume  $-\langle \mathbf{A}_i, \mathbf{r}\mathbf{r} \rangle + \lambda > 0$ , we must have

$$\tau_i = \frac{(-\langle \mathbf{A}_i, \mathbf{r}\mathbf{r} \rangle + \lambda)^2}{\|\mathbf{A}_i\|^2} \quad (43)$$

$$\leq \frac{(-\langle \mathbf{A}_i, \mathbf{r}^{(t-1)} \rangle + \lambda + \|\mathbf{A}_i\| \|\mathbf{r}^{(t-1)} - \mathbf{r}\mathbf{r}\|)^2}{\|\mathbf{A}_i\|^2} \quad (44)$$

$$\leq (q^{(t-1)} - \frac{1}{2}\nu)^2 \quad (45)$$

$$< q^{(t-1)}. \quad (46)$$

Otherwise, we must have  $-\langle \mathbf{A}_i, \mathbf{r}\mathbf{r} \rangle + \lambda < 0$ , which ensures  $\tau_i \leq 0 \leq q^{(t-1)}$ . In addition,  $q^{(t-1)}$  is bounded as  $t \rightarrow \infty$  due to (41). As a result, whenever  $i$  is returned by `get_next_coordinate()` during an iteration  $t > t'$ , then  $P(U^{(t)})$  is bounded away from zero. As  $t \rightarrow \infty$ , the delay  $D_i^{(t)}$  increases as, at a minimum, nonzero-valued coordinates are updated. Thus, for an eventual iteration  $T$ , we have

$$P(U^{(t)})D_i^{(t)} \geq \xi^{(t)}. \quad (47)$$

At this point, an update to coordinate  $i$  is computed. From (42), it follows that

$$\delta \geq \frac{1}{2} \frac{\nu}{\|\mathbf{A}_i\|^2}, \quad (48)$$

which ensures that

$$f(\mathbf{x}^{(T)}) \leq f(\mathbf{x}^{(T-1)}) - \frac{1}{2} \|\mathbf{A}_i\|^2 \delta^2 \quad (49)$$

$$\leq f(\hat{\mathbf{x}}) + \epsilon - \frac{1}{2} \frac{\nu^2}{\|\mathbf{A}_i\|^2} \quad (50)$$

$$\leq f(\hat{\mathbf{x}}) - \frac{3}{8} \frac{\nu^2}{\|\mathbf{A}_i\|^2}. \quad (51)$$

This contradicts the definition of  $\hat{\mathbf{x}}$ . Thus, our assumption that  $\mathbf{x}^{(t)}$  does not converge to a solution of (P) is incorrect.  $\square$

## F. Generalizing StingyCD to Linear SVMs

In this section, we briefly describe how to apply StingyCD to the problem

$$\begin{aligned} \underset{\mathbf{x} \in \mathbb{R}^n}{\text{minimize}} \quad & \frac{1}{2} \|\mathbf{M}\mathbf{x}\|^2 - \langle \mathbf{1}, \mathbf{x} \rangle \\ \text{s.t.} \quad & \mathbf{x} \in [0, C]^n \end{aligned} \quad . \quad (\text{PSVM})$$

We note that (PSVM) is very similar to (P). If not for the constraint that  $\mathbf{x} \leq C\mathbf{1}$ , in fact, (PSVM) would be an instance of (P)—we could solve (PSVM) by defining  $\mathbf{A} = \mathbf{M}$ ,  $\mathbf{b} = \mathbf{0}$ , and  $\lambda = -1$  and then running Algorithm 2.

To incorporate the new constraint, our CD update becomes

$$\delta_{\text{SVM}} = \min \left\{ C - x_i^{(t-1)}, \delta \right\} .$$

In this case, StingyCD's same rule applies for guaranteeing coordinate  $i$  remains 0 during iteration  $t$ . With a minor change, we can also check if  $x_i^{(t-1)}$  is guaranteed to remain  $C$  during iteration  $t$ . Specifically, if  $x_i^{(t-1)} = C$  and  $q^{(t-1)} \leq -\tau_i$ , then it is guaranteed that  $\delta_{\text{SVM}} = 0$ .

## G. Additional comparisons for Lasso problems

This section contains results using additional values of  $\lambda$  for the experiments in §6.1. In general, we find the results to be quite consistent, regardless of  $\lambda$ . Only “CD + Safe Screening” seems to be greatly affected by this parameter.

### G.1. Full results for finance dataset

Number of examples:  $1.6 \times 10^4$ . Number of features:  $5.5 \times 10^5$ .

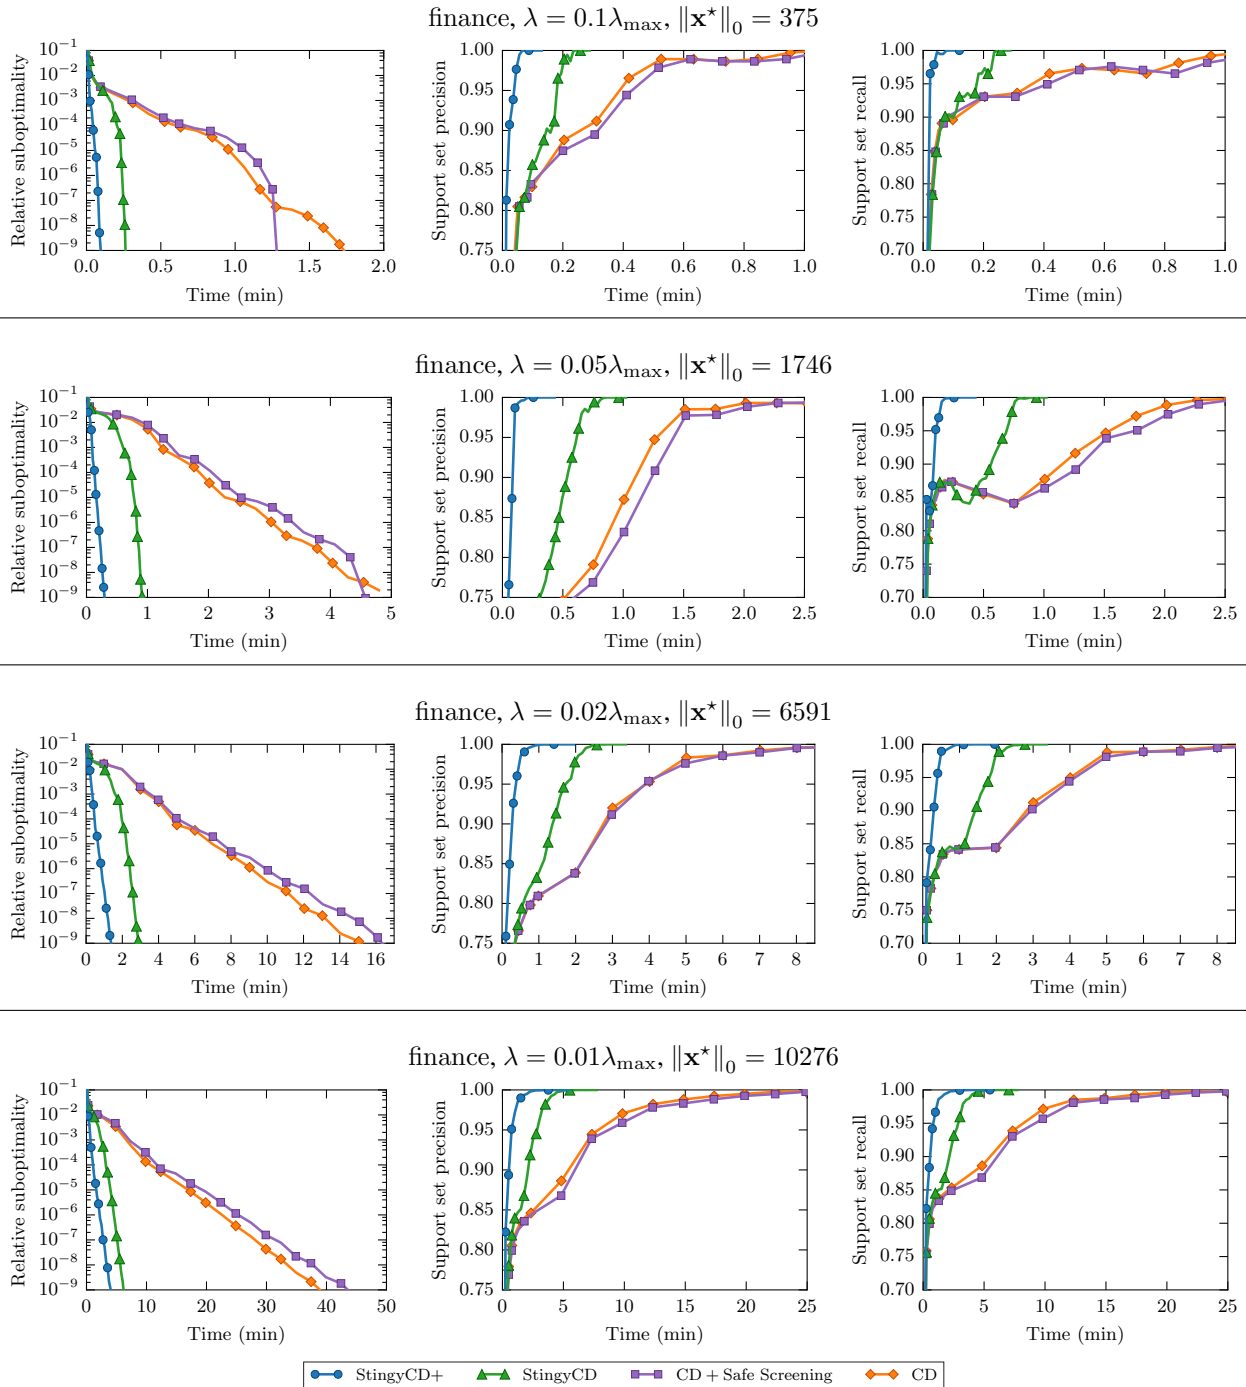



G.2. Full results for allstate dataset

Number of examples:  $2.5 \times 10^5$ . Number of features:  $1.5 \times 10^4$ .

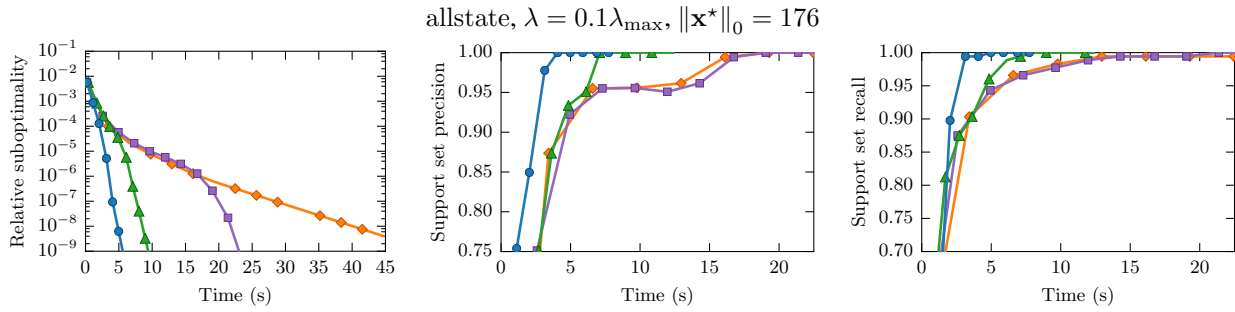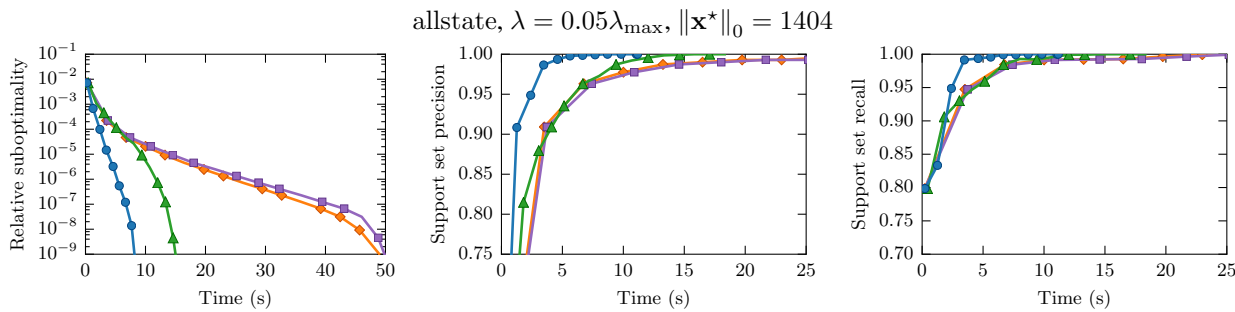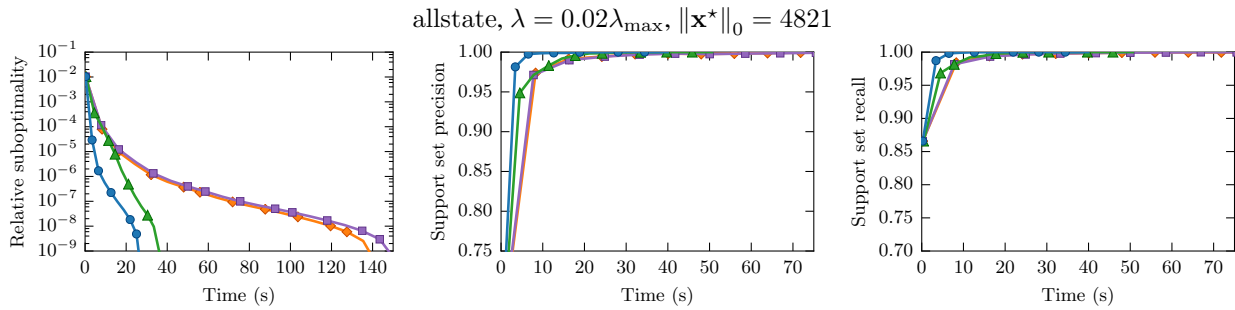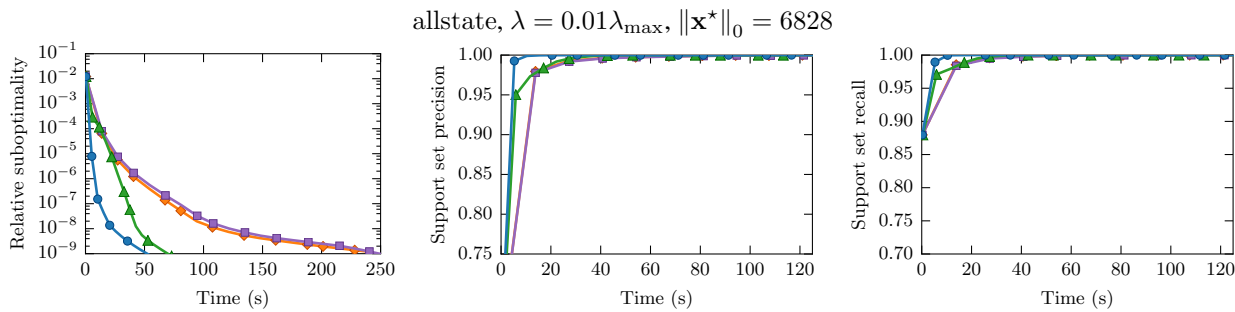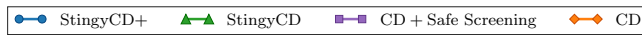

## H. Additional comparisons for logistic regression problems

### H.1. Full results for lending\_club dataset

Number of examples:  $1.1 \times 10^5$ . Number of features:  $3.1 \times 10^4$ .

lending\_club,  $\lambda = 0.05\lambda_{\max}$ ,  $\|\mathbf{x}^*\|_0 = 272$

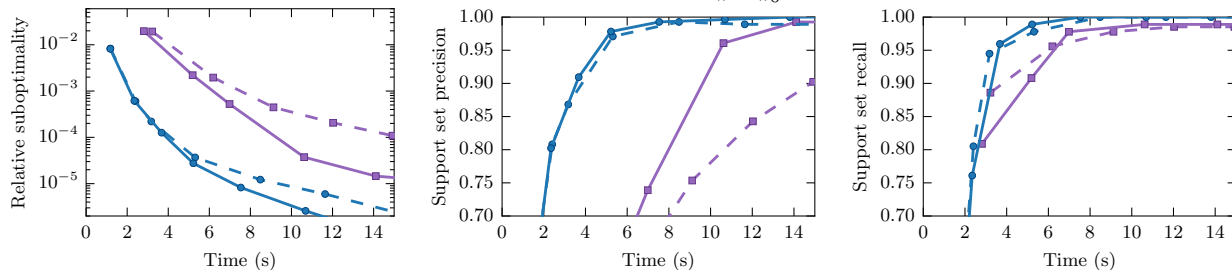

lending\_club,  $\lambda = 0.02\lambda_{\max}$ ,  $\|\mathbf{x}^*\|_0 = 878$

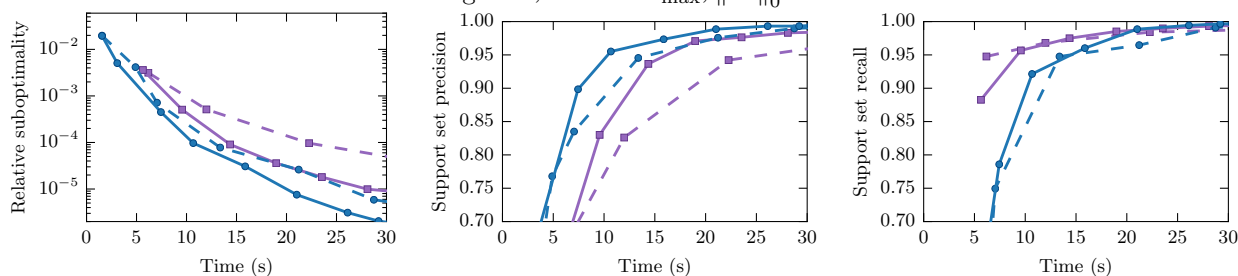

lending\_club,  $\lambda = 0.01\lambda_{\max}$ ,  $\|\mathbf{x}^*\|_0 = 1937$

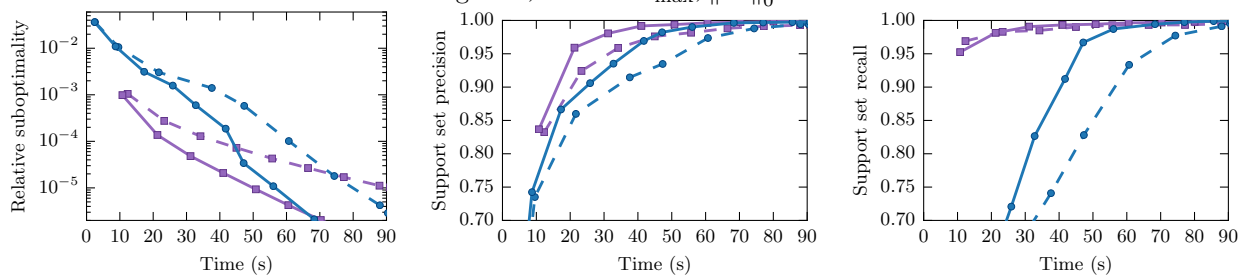

lending\_club,  $\lambda = 0.005\lambda_{\max}$ ,  $\|\mathbf{x}^*\|_0 = 3780$

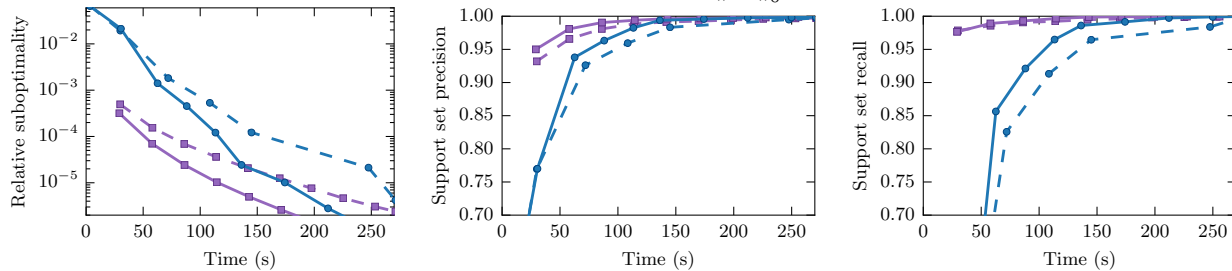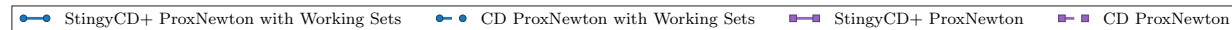

H.2. Full results for kdda dataset

Number of examples:  $8.4 \times 10^6$ . Number of features:  $2.2 \times 10^6$ .

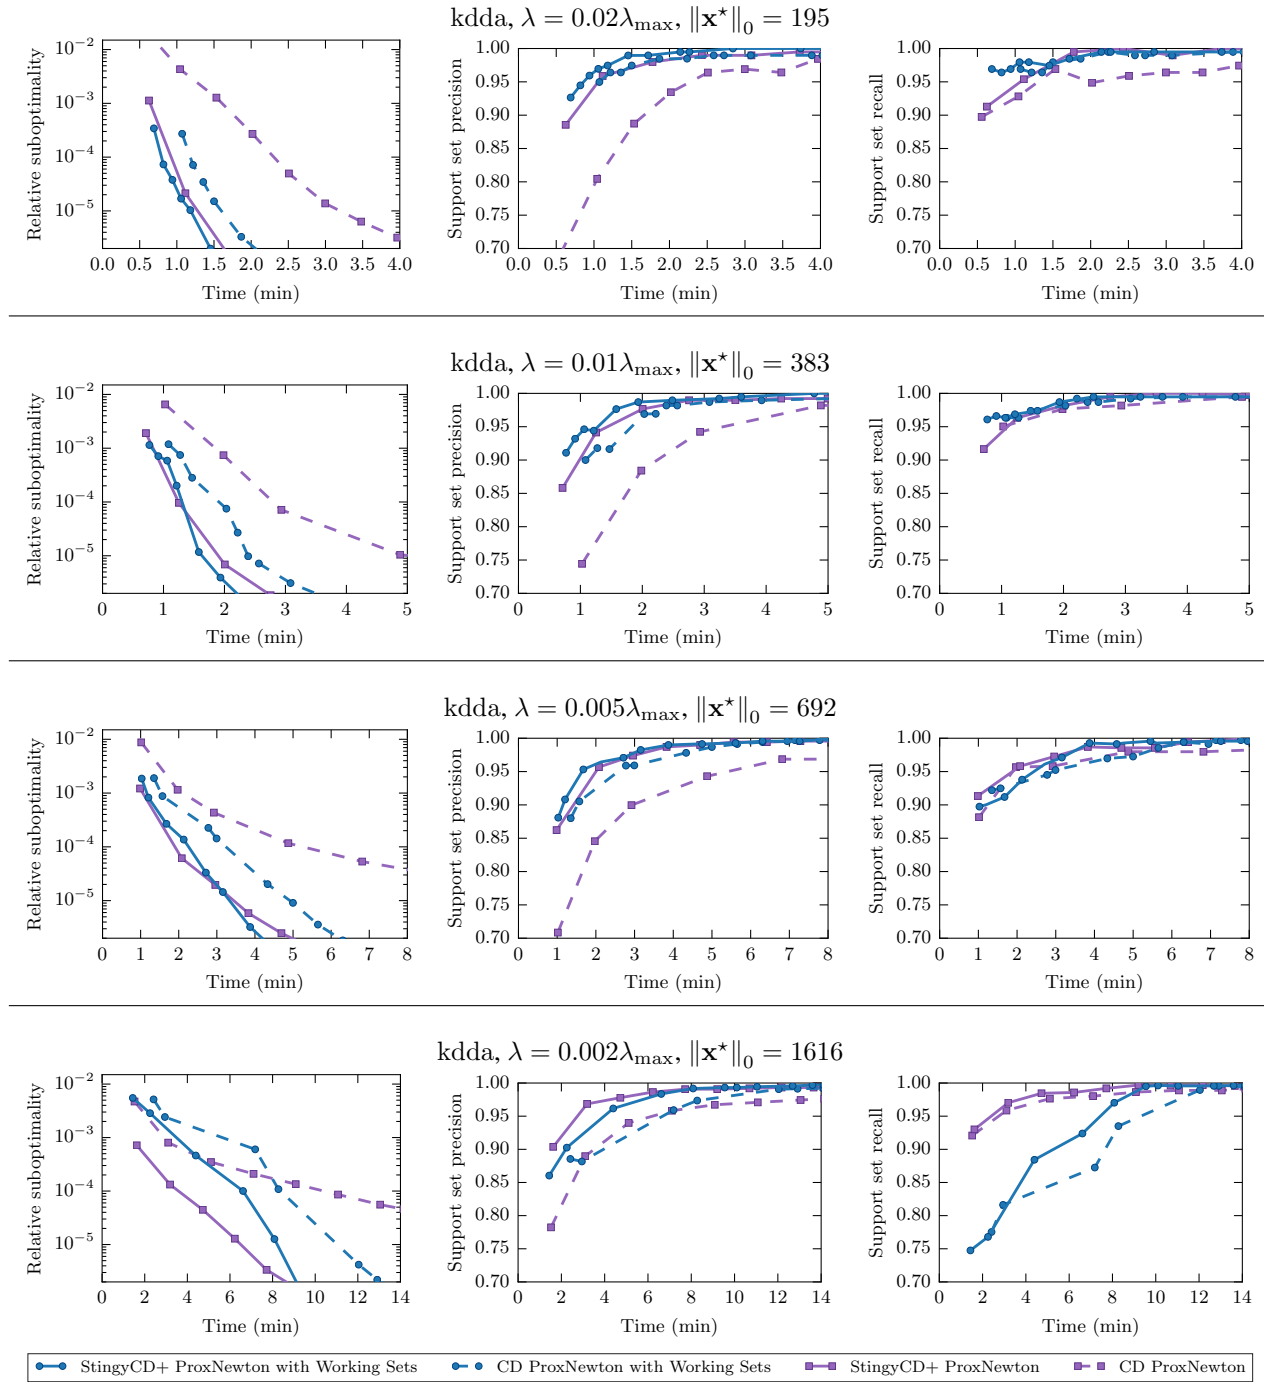

Supplement: Supplementary file 1 [file johnson17a-supp.pdf]
